# Supplementary material for: Sepsis in children
Source: HighWire-hosted journal article supplement (doi:10.1136/bmj.h3017), 2015-06-09
Supplement: bmj.h3017.pdf [file bmj.h3017.pdf]

## 儿童脓毒症

### Sepsis in children

来源:BMJ 2015;350:h3017 doi: 10.1136/bmj.h3017

脓毒症(sepsis)是一种由感染导致的全身炎症反应综合征<sup>1</sup>。其特征在于泛化的促炎症瀑布反应,由此可能导致广泛的组织损伤<sup>2</sup>,依据严重程度不同,包括一系列临床谱:严重脓毒症、脓毒性休克,以及多脏器衰竭<sup>3</sup>。脓毒症是全球儿童发病和死亡的主要原因<sup>4</sup>。

国际共识的准则定义脓毒症为全身炎症反应综合征合并可疑或已证实的感染<sup>3</sup>。脓毒症有一个更为实用的定义已被提出——脓毒症是感染导致的一种全身炎症反应,伴随着一定程度的器官功能障碍<sup>5</sup>。这个定义目前尚未被广泛认可,但新的标准正在讨论中,并将于年内出版。

#### 脓毒症的流行病学如何?

儿童脓毒症的全球数据尚不完整,但据估计感染是5岁以下儿童主要的死亡原因(接近60%)<sup>4</sup>。世界卫生组织指出全球儿童死亡的四大原因均为感染性疾病:

#### 你必须知道

- 儿童脓毒症最初的临床表现可能是非特异性的(特别是在低年龄组)。
- 鉴于严重脓毒症和脓毒性休克的时间紧迫性,在临床上怀疑脓毒症时,通常最好即刻开始检查和治疗脓毒症,包括液体复苏,并继续这些措施,直到排除脓毒症。
- 疾病进展到器官衰竭和休克往往是迅速的,所以早期识别和治疗至关重要。
- 除了抗生素,目前还没有证实有价值的特异性治疗。
- 根据国际性认可的、基于指南的共识,抗生素治疗后的其他治疗均为支持治疗,并应继续给予。

肺炎(190万人死亡/年),腹泻(160万人死亡/年),疟疾(110万人死亡/年),麻疹(55万人死亡/年)<sup>6</sup>。

最大的关于儿童严重脓毒症发病率流行病学的报告来自于美国的队列研究。这些研究中的两项研究描述了在美国7个州的医院里,急诊入院的儿童严重脓毒症(定义为20岁以下)的年发病率<sup>7-8</sup>。这些研究显示在研究时间段内,严重脓毒症的年发病率逐年上升[(0.56~0.89)例/1 000名儿童,在所有年龄组]<sup>8</sup>。在这些队列中,低龄组严重脓毒症的发病率显著升高(新生儿和1岁以下婴儿组的发病率分别为每1 000例中9.7例和2.25例,与1~19岁儿童相比,后者仅0.23~0.52例)。有合并症的儿童更易发生严重脓毒

#### 来源和选择标准

我们检索了从2008年10月至2013年10月Medline和Embase,以及至2013年9月Cochrane图书馆出版(在线)的有关治疗、预防和诊断的系统性综述和随机对照试验(任何大小),并使用“sepsis”“severe sepsis”“septic shock”“paediatric”“children”等关键词在特定的网站搜索相关指南。我们的检索更新至2015年1月。其他数据来源于作者机构的指南和策略。

Adrian Plunkett  
consultant paediatric  
intensivist<sup>1</sup>,  
Jeremy Tong  
consultant paediatric  
intensivist<sup>2</sup>

<sup>1</sup>Birmingham  
Children's Hospital,  
Birmingham, UK ;  
<sup>2</sup>University Hospitals  
of Leicester NHS  
Trust, Leicester, UK

Correspondence to:  
A Plunkett  
adrian.plunkett  
@bch.nhs.uk

林瑶译  
首都儿科研究所  
附属儿童医院  
杜忠东校  
首都医科大学附属  
北京儿童医院

症。尽管严重脓毒症的发病率不断上升,病死率已经从10.3%下降到8.9%<sup>8</sup>。

最近发表的研究描述了在儿科重症监护病房严重脓毒症的患病率:一个大型的多中心队列研究通过收集42个儿科重症监护病房的数据,得出美国儿科重症监护病房中严重脓毒症的患病率为7.7%。这与美国其他流行病学数据相一致,并证实严重脓毒症的患病率在上升,而病死率在下降<sup>9</sup>。

最近,一项大型的在世界各地儿科重症监护病房开展的严重脓毒症的国际患病研究[脓毒症患病、预后、治疗(SPROUT)]已出版。这项研究发现,全球儿科重症监护病房严重脓毒症的患病率为8.2%(95%可信区间为7.6%~8.9%)<sup>10</sup>。

## 什么导致脓毒症?

脓毒症是对感染的全身反应。因此,原发性病因可以归因于感染病原体与宿主反应。虽然任何感染都可能诱发脓毒症,最常见的病原体是细菌、病毒和真菌。根据宿主因素,包括年龄、合并症和居住地,病原体的种类各异。不同患者组的典型或重要病原体见框图1<sup>7,11-14</sup>。

对感染的正常宿主反应是局限和控制感染的炎症反应过程。固有的免疫细胞(如巨噬细胞)在识别入侵的病原体后,炎症反应被激发。例如,革兰阴性细菌的脂多糖能够被固有免疫细胞上的受体识别。与这些位点结合后,免疫细胞被激活分泌

### 框图1 脓毒症的典型或重要病原体

#### 早发型新生儿脓毒症

定义为出生后第一个72小时内发生的新生儿脓毒症<sup>15</sup>

- B组链球菌和革兰阴性细菌(尤其是大肠杆菌)是迄今早发型新生儿脓毒症最常见的病原体<sup>16</sup>
- 金黄色葡萄球菌、凝固酶阴性葡萄球菌、流感嗜血杆菌、肠球菌是早发型新生儿脓毒症其他细菌性病因的主要病原
- 李斯特菌引起的感染罕见,但对于孕妇和他们的胎儿具有不成比例的倾向性<sup>17</sup>。这个病菌可能与早发型或晚发型新生儿脓毒症有关

#### 晚发型新生儿脓毒症

定义为发生在出生后第一个72小时至1个月的新生儿脓毒症<sup>18</sup>

- 凝固酶阴性葡萄球菌目前是晚发型新生儿脓毒症的主要原因,源于住院新生儿血管导管相关感染的高发病率
- 也可能由一些早发型新生儿脓毒症的病原体导致

#### 婴儿和幼儿

- 肺炎链球菌仍然是儿童侵袭性细菌感染的主要原因
- 脑膜炎奈瑟菌呈双峰年龄分布,影响低龄儿童和青少年。自从疫苗普及后,这种细菌感染并不常见
- 金黄色葡萄球菌和A组链球菌均可引起健康儿童发生严重脓毒症
- B型流感嗜血杆菌是全球脓毒症的重要原因,但由于疫苗的接种,它在发达国家罕见
- 百日咳虽然罕见,但在未预防接种的婴幼儿可能会导致严重的疾病
- 在资源贫乏的环境中,对特定感染微生物的数据不太可靠,但腹泻和肺炎是最常见的感染(以及死亡)<sup>4</sup>

#### 住院婴儿和儿童

- 医院感染的原因取决于当地的细菌流行病学
- 凝固酶阴性葡萄球菌通常与血管导管感染相关
- 耐甲氧西林金黄色葡萄球菌(MRSA)在英国比美国更少见
- 革兰阴性细菌,如铜绿假单胞菌、Klebsiella种、大肠杆菌和不动杆菌

#### 无脾或功能性无脾

- 沙门菌脓毒症,包括镰状细胞病、沙门菌骨髓炎
- 其他有荚膜的微生物(例如,肺炎链球菌、流感嗜血杆菌)

#### 蚊媒病

- 疟疾(恶性疟原虫)、登革热病毒和类鼻疽伯霍尔德杆菌(类鼻疽)是在流行地区严重脓毒症的重要致病微生物

#### 其他生物体

- 真菌(如白色念珠菌、曲霉菌属)和病毒(如流感病毒、呼吸道合胞病毒、人类偏肺病毒、水痘和单纯疱疹病毒)分别占儿童严重脓毒症致病原的5.3%和2.9%

促炎细胞因子,使中性粒细胞聚集到感染部位。这些中性粒细胞释放促炎细胞因子,导致血管舒张和血管通透性增加(毛细血管渗漏)。在正常宿主反应中,这种促炎症反应被同步的抗炎反应调节和局限化。当这种正常的促炎症宿主反应超过通常的稳态约束,变成一个泛化过程时,脓毒症就会发生,其产生的炎症反应已远非感染源本身。

虽然脓毒症的这种发病模式比较直观,但新兴的研究结果表明,它可能过于简单化了,其病理生理包括内皮细胞功能障碍、细胞死亡、生物能量紊乱和免疫麻痹等过程。

数据表明患者宿主反应存在显著的异质性。这种异质性存在于促炎症和抗炎过程的平衡,以及体液和细胞改变<sup>19</sup>。

## 脓毒症能预防吗?

### 初级预防

初级预防的主要方法是接种疫苗。对于许多社区获得性儿科感染,免疫接种是非常成功和具有成本效益的。免疫接种使全球根除天花,并大大降低了许多传染性疾病的患病率(如脊髓灰质炎、麻疹、破伤风、白喉和麻疹)。生物技术的进步催生了疫苗改良和新的疫苗研发,包括针对B型流感嗜血杆菌、脑膜炎奈瑟菌(C型)和肺炎链球菌的疫苗<sup>20</sup>。

一个新的B群脑膜炎球菌疫苗在欧洲已注册。2015年,在英国,B群脑膜炎球菌疫苗将列入常规儿童疫苗接种计划<sup>21</sup>。

免疫计划是全球重要的公共卫生措施,但就现有的疫苗产品的获取情况,存在全球不平等现象。世界卫生组织全球疫苗行动计划旨在通过促进世界范围内疫苗获取而降低感染造成的死亡<sup>22</sup>。

初级预防也和感染相关的医疗保健领域相关。由于这些感染涉及特定的介入措施(如插入血管导管),通过改进临床实践(如改进洗手行为、保护性隔离和综合预防)则有机会降低感染的风险。这方面一个成功的例子就是通过采取临床和非临床干预措施,在成人和儿科重症监护室减少静脉导管的血流感染<sup>23</sup>。

### 筛查

在无症状人群中筛查脓毒症是无用的。然而,在怀孕期间筛选B组链球菌的定植产妇,已经显示

出在某些情况下可减少新生儿B组链球菌病的发病数量。

B组链球菌的筛查存在争议,并没有在发达国家的所有地区实行。例如,在英国没有筛查计划,因为担心目前的筛查测试并不能充分证实携带B组链球菌的孕妇其婴儿会患侵入性B组链球菌病。

美国预防B组链球菌所致的早发型新生儿脓毒症指南发布于2002年,推荐所有妊娠35~37周的孕妇进行全面筛查。筛查的目的是确定对新生儿有B组链球菌传播风险的妇女;这些妇女将接受产时抗生素治疗<sup>24</sup>。这个项目实施后,B族链球菌导致的早发型新生儿脓毒症戏剧性减少<sup>25</sup>。关于筛查项目的指南和效果给予了定期回顾和更新。指南的最新版本继续建议在35~37周进行普查<sup>26</sup>。

### 二级预防

对原发病(如白血病)导致免疫功能低下的患者,建议长期预防性使用抗菌药物、抗病毒药物,或抗真菌药物。囊性纤维化和其他呼吸道疾病儿童可以预防性使用抗菌药物(如复方新诺明)。目前证据不足以支持对中心静脉置管的儿童预防性使用抗生素预防感染<sup>27</sup>。

## 如何诊断脓毒症?

脓毒症应被视为一个时间紧迫的急症,疾病可能迅速进展为器官衰竭、休克和死亡。因此,及时和早期识别这种情况非常重要。及时应用抗生素和其他支持疗法已被证明能改善预后,一旦怀疑脓毒症,早期就应该开始积极治疗。一般来说,任何的急性疾病或新生儿群体(包括早产儿)出现任何的病情变化,不同于平时观察的正常状态,均应怀疑脓毒症的存在。

虽然实验室测试(如血液培养和生物标志物)有助于保证或支持诊断,但必须首先通过临床判断来做出诊断。临床怀疑并不总是符合标准化的诊断标准。国际共识指南的诊断标准被认为主要是研究标准,旨在促进有意义的研究(框图2)。然而,临床怀疑脓毒症,通常是一个临床判断(例如,特定临床模式识别或特定临床综合征)。研究标准和临床判断并不总是一致:高达1/3的临床脓症患者不能达到研究诊断标准<sup>28</sup>。

因此,鉴于严重脓毒症和脓毒性休克的时间紧

**框图2 儿童脓毒症的定义<sup>\*</sup>(摘自儿童脓毒症国际共识会议<sup>3</sup>)****感染**

疑似或已证实的任何病原体感染

**全身炎症反应综合征**

全身炎症反应定义为 $\geq 2$ 个下列标准(温度异常或白细胞计数必须是标准之一):

- 异常核心温度( $< 36^{\circ}\text{C}$ 或 $> 38.5^{\circ}\text{C}$ )
- 心率异常( $>$ 同年龄2个以上标准差,或如果患儿年龄小于1岁,低于同年龄第十百分位数)
- 呼吸频率异常(高于同年龄2标准差,或因急性肺疾病需机械通气)
- 循环血中白细胞计数异常(高于或低于同年龄正常范围,或 $> 10\%$ 未成熟白细胞)

**脓毒症**

感染时全身炎症反应综合征

**严重脓毒症**

脓毒症合并心血管功能障碍、急性呼吸窘迫综合征或 $\geq 2$ 个器官功能障碍

**脓毒性休克**

1小时内给予至少40 ml/kg的液体复苏后,脓毒症合并心血管功能障碍仍持续存在

**难治性脓毒性休克**

液体复苏难治性脓毒性休克—— $\geq 60$  ml/kg的液体复苏后休克仍未纠正

儿茶酚胺抵抗性脓毒性休克——给予儿茶酚胺(即多巴胺和肾上腺素输注,或两者同时输注,或去甲肾上腺素)治疗后休克仍未纠正

**新生儿脓毒症的分类**

新生儿脓毒症定义为出生后28天的婴儿脓毒症临床综合征或在血液中分离出病原体,或两者均有<sup>29</sup>。相对于年龄较大的儿童,新生儿脓毒症的临床症状及体征往往不明显或更难以分辨。新生儿脓毒症通常根据出生后的发病时间分类:

早发型新生儿脓毒症——出生后第一个72小时内发生的脓毒症<sup>15</sup>

晚发型新生儿脓毒症——出生后第一个72小时后发生的脓毒症<sup>18</sup>

**按年龄组分类**

旨在保证分类一致性的目的,以下年龄分组用于指导生理变量和实验室检测值的正常范围<sup>3</sup>:

早期新生儿——0天~1周

新生儿——0天~1个月

婴儿——1月~ $< 2$ 岁

幼儿和学龄前儿童—— $\geq 2$ 岁~ $< 6$ 岁

学龄儿童—— $\geq 6$ 岁~ $< 13$ 岁

青少年和年轻人—— $\geq 13$ 岁~ $< 18$ 岁

注意:这个年龄分类中不包括早产儿。

<sup>\*</sup>下列标准化的定义最初由小儿脓毒症国际共识会议制定,旨在为大型多中心临床试验提供标准化的入选标准。在医疗过程中进行脓毒症的临床诊断一定会早于按分类标准做出的诊断

迫性,临床怀疑脓毒症时,通常最好按脓毒症立即开始检查和治疗,直到排除脓毒症。

**脓毒症的临床特征**

脓毒症的典型表现根据患儿的年龄而有所不同。年龄较大的儿童可能会以感染为主要表现,婴儿和新生儿通常表现为非特异性症状和体征。在年长的婴儿和儿童,脓毒症通常表现为全身炎症反应综合征(定义见框图2),最常见的特点是发热<sup>3</sup>。

医疗过程中,脓毒症的临床诊断必须早于按分

类标准做出的诊断,并且在实践中,如果一个孩子怀疑或证实感染,并至少有以下两条以上,临床医生应考虑脓毒症或脓毒性休克:

- 核心温度 $< 36^{\circ}\text{C}$ 或 $> 38.5^{\circ}\text{C}$ ( $< 97^{\circ}\text{F}$ 或 $> 101^{\circ}\text{F}$ )。
- 不适当的心动过速(根据当地标准或高级儿科学生命支持指南)。
- 意识改变(如嗜睡、易怒、倦怠、松弛)。
- 外周灌注减少或毛细血管再充盈时间延长。

如果有疑问,应该咨询有经验的儿科医生<sup>30</sup>。

发热定义为体温高于正常的每日变化范围[即



### 框图3 脓毒性休克的冷休克和热休克

#### 冷休克

- 婴幼儿脓毒症更常见<sup>32</sup>
- 临床表现为外周全身血管收缩、末梢发凉和毛细血管再充盈时间延长
- 除非患者处于垂死状态,通常血压是正常的(或甚至可能高),但患者通常存在心动过速
- 潜在的问题是继发于心肌收缩力减弱的低心输出量,导致低心输出量和外周血管收缩

#### 热休克

- 临床表现为血管麻痹,使全身血管阻力降低,所以毛细血管再充盈时间较快(“闪光”样瞬间毛细血管充盈)和脉搏通常有力或冲击样
- 脉压高(通常由于舒张压低),患者通常存在心动过速
- 通常高心输出量状态,但患者发生休克部分原因是由于循环扩张(通过全身血管的扩张)超出了心输出量能够供应的范围
- 年长儿(和成人)更常见,医院获得性脓毒症更为常见<sup>32</sup>

37.5 °C以上(99.5 °F)]<sup>31</sup>。关于脓毒症的诊断,共识的标准指出其核心温度必须超过38.5 °C(101 °F),但中性粒细胞减少的患者需降低阈值,如果他们核心温度>38 °C(>100 °F)应考虑脓毒症。

在婴幼儿和足月及早产儿,脓毒症的症状和体征通常是模糊和非特异性的。这个年龄组的脓毒症通常最初只表现为不同于平时观察到的孩子的正常状态。例如,早产婴儿在新生儿重症监护病房可能以出现新的心动过缓、呼吸暂停发作或喂养不耐受为脓毒症的首发症状。一个通过较低的诊断标准来考虑脓毒症的有用的经验是,如果婴儿或新生儿出现新的体征或症状,或观察到有偏离正常状态的情况,就考虑脓毒症。在年长儿童,如果存在急性疾病尚不能被完全解释,也应该使用较低的诊断标准来诊断脓毒症。

在所有年龄组,如果脓毒症进展,患儿可能发展为严重脓毒症或脓毒性休克。脓毒性休克可分为2种主要的临床表现:冷休克和热休克(框图3)。

在两种休克状态下,除了心血管系统外,患者会出现休克的临床症状,其中最重要的是神经功能的损伤。这可能表现为婴儿和新生儿易激惹,新生儿和早产儿呼吸暂停,年长儿嗜睡、迟钝或谵妄。

儿童即使在休克的晚期血压也经常保持在正

常水平,因此低血压往往是脓毒性休克的一个终末征象。

暴发性紫癜是一种全身分布的压之不褪色的紫癜性皮炎,通常见于脑膜炎球菌血症,但也可能是肺炎球菌相关的严重脓毒症。

尿量减少是急病儿童常见的症状,经常反映一定程度的脱水(由于摄入减少、过多的液体损失,或两者兼而有之)。这不是脓毒症的特异表现,但脓毒症时通常存在,特别是脓毒症发病前如果存在前驱病毒感染。

英国国家健康与临床优选研究所(NICE)开发了一种基于临床体征的“交通灯”系统,这有助于医生评估年幼的孩子在出现发热时发生严重疾病的可能性([www.nice.org.uk/guidance/cg160/resources/cg160-feverish-illness-in-childrensupport-for-education-and-learning-educational-resource-trafficlight-table2](http://www.nice.org.uk/guidance/cg160/resources/cg160-feverish-illness-in-childrensupport-for-education-and-learning-educational-resource-trafficlight-table2))。

#### 检查

没有一种实验室检查能够单独证实或否定脓毒症的诊断,但许多检查可以提供支持或辅助性的有用信息。框图4列出了可考虑实施的检查。

其他的临床症状和体征将指导临床医生选择特定的微生物标本。例如,儿科重症监护病房的患儿疑似呼吸机相关性肺炎时,可以做支气管肺泡灌洗液涂片显微镜检查和培养;脑膜炎球菌败血症的疑似临床病例,可以考虑血脑膜炎球菌聚合酶链反应(PCR)分析,以帮助明确诊断;免疫功能低下的脓毒症儿童(如白血病儿童化疗后中性粒细胞减少),可以考虑呼吸道或机会性病毒(如腺病毒、巨细胞病毒、单纯疱疹病毒)的血清学或PCR检查。而关于标本的采集和测试,临床医生应查阅当地的方案。如果怀疑新生儿单纯疱疹病毒感染,可考虑行单纯疱疹病毒PCR(血液和脑脊液)检查。

尽管有足够的微生物标本送检,许多脓毒症儿童的病原仍不明确,称为培养阴性的脓毒症<sup>37</sup>。

生物标志物在脓毒症和脓毒性休克的诊断与监测中的应用越来越引起人们的兴趣。一个关键问题(特别是在重症监护病房)就是脓毒症与无感染的全身炎症反应的鉴别,临床体征可能并不能提供帮助。最经常使用的两个生物标志物是C反应蛋白(CRP)和血清降钙素原。在这个方面,血清降钙素原最具潜力,一项研究表明在新生儿和年长儿中,对比CRP,其对脓毒症的诊断显示出更高的准确

## 框图4 脓毒症的诊断试验

### 首选的检查

全血细胞计数和分类——根据年龄的白细胞计数异常(高或低)是全身炎症反应综合征的诊断标准之一。低或正常细胞计数是严重脓毒症发病初期的一个特征,如果有提示脓毒症的临床症状,应考虑脓毒症的诊断。脓毒症时的血小板减少症(血小板计数 $<80\,000/\mu\text{l}$ 或3天内从最高值下降了50%),如果合并凝血功能障碍则提示弥散性血管内凝血。

血糖——中度低血糖指血糖介于2.0~3.0 mmol/L之间,严重低血糖指血糖水平低于2 mmol/L<sup>33</sup>。作为脓毒症应激反应的一部分,高血糖也是常见的。皮质类固醇治疗的不良反应也可出现高血糖。还可能由于糖原储存耗尽而出现低血糖。

血培养——许多婴幼儿脓毒症有原发性菌血症,血培养往往是重要的。这应该在脓毒症临床诊断后尽快进行,最好在抗生素治疗之前,但一旦疑似脓毒症,等待血培养结果期间即应给予经验性抗生素治疗。

血培养的敏感性与取血量的多少成正比。当在新生儿使用新生儿有氧培养瓶时,从静脉穿刺或新置入的血管导管(动脉或静脉)最少取1 ml血可能足够诊断菌血症<sup>34</sup>。当使用标准的有氧培养瓶时,做48小时有效的阴性培养需要至少4 ml的血液。根据不同的机构,可能会首选不同的培养,但重要的是要避免延误抗生素的使用。有时建议临床医生从留置部位(如中心静脉)和外周血管取培养物进行两组培养。

血培养结果应该每12~24小时进行观察;大多数阳性的结果将在48小时内被检测出来,很多人会在24小时内培养出来<sup>35</sup>。

尿液分析和尿培养分析——所有脓毒症的新生儿应考虑做尿液分析(尿亚硝酸盐检测、显微镜检、革兰染色及培养)(尽管是生后第一周,一个阳性的尿培养结果可能提示严重的菌血症)。有症状的可疑尿路感染的年长儿应考虑本项检查。液体复苏前,尿液分析可能难以完成。

血气分析——虽然在急诊室,儿童很少行动脉血气检查,毛细血管或静脉血气也往往能获得临床有用的信息。

- 碱减少的过多是严重脓毒症的一个重要标志,可能是最早出现的能够预示病情严重程度的标志物
- 高碳酸血症或低氧血症支持呼吸功能障碍的诊断<sup>3</sup>
  - 低氧血症——P/F比值(动脉血氧分压/吸入氧分数) $<300$ (不存在紫绀型心脏病或肺部基础疾病的情况下)
  - 高碳酸血症——动脉二氧化碳分压 $>65\text{ mmHg}$ ,或基线水平以上20 mmHg
- 要求数值较高的吸入氧分数提示脓毒症相关呼吸衰竭<sup>3</sup>
- 要求数值较高的吸入氧分数提示脓毒症相关的呼吸衰竭,因此应行脉搏血氧饱和度监测

血清乳酸——血清乳酸水平增加提示氧供应不足,在脓毒症时,这种情况提示脓毒性休克<sup>3</sup>。动脉样本乳酸的评估最可靠;静脉和毛细血管乳酸结果应谨慎解释。

血清电解质——脓毒症时常存在电解质紊乱。应该测量基础水平的电解质,并定期检测,直到患者改善。

血清肌酐——血清肌酐增加(即血清肌酐 $>$ 正常值的上限2倍或血清肌酐增加 $>$ 基线水平的2倍)提示脓毒症相关的肾功能衰竭<sup>3</sup>。

肝功能检查——胆红素水平增加(除新生儿以外)或丙氨酸氨基转移酶增加提示脓毒症相关的肝脏功能障碍<sup>3</sup>。

凝血功能检查——在脓毒症和血小板减少症时,凝血功能异常(国际标准化比值 $>2$ ,活化部分凝血活酶时间延长,纤维蛋白原水平下降,D二聚体水平增加)提示弥散性血管内凝血<sup>3,36</sup>。

C反应蛋白(CRP)——可能有助于脓毒症和脓毒性休克的诊断和监测。它不像血清降钙素原那么特异,但更常用。关于CRP的使用目前实践各不相同,临床医生应继续根据临床情况判断脓毒症。

胸部影像学——呼吸窘迫的婴幼儿疑似脓毒症时应行胸部X线检查,以评估肺部变化(如支气管肺炎的大叶性实变)。

### 考虑做的检查

腰椎穿刺——如果可疑有脑膜炎不合并脓毒症,并且没有紫癜或瘀斑皮疹,患儿病情稳定,可以安全地进行穿刺时,临床医师应考虑腰椎穿刺(脑脊液液体蛋白和葡萄糖浓度、显微镜与革兰染色、细菌培养)以排除脑膜炎<sup>34</sup>。严重脓毒症患儿腰椎穿刺通常是禁忌的,因为严重脓毒症患儿行腰椎穿刺可能会导致死亡。脑脊液培养结果阳性可证实细菌性脑膜炎,并提供病原菌类型,包括对抗生素敏感性的信息;蛋白质水平可能增加;血糖水平可能较低。

脑膜炎球菌的聚合酶链反应(PCR)分析——这可能有助于确定可疑或疑似脑膜炎球菌脓毒症的临床病例的诊断,但它并没有被广泛使用。

支气管肺泡灌洗液培养——在儿科重症监护室疑似呼吸机相关性肺炎的患儿,应行支气管肺泡灌洗液培养。

单纯疱疹病毒PCR(血液和脑脊液)——新生儿单纯疱疹病毒感染(无论是在中枢神经系统或播散性)罕见,但是严重脓毒症儿童应考虑的一个重要因素。如果可能存在新生儿单纯疱疹感染时,应考虑本项检查。

### 新兴的检查

血清降钙素原——这种生物标志物可能对脓毒症和脓毒性休克的监测诊断有用,但测试并未普遍应用。在英国或欧洲,目前它尚未被列入诊疗标准。

新兴的生物标志物——其他生物标志物(如CD64、白细胞介素18、质谱、特异性mRNA的表达)被认为是新兴的,尚未广泛使用或被验证。

性<sup>38</sup>。然而,它不像CRP那样容易获得,正因为如此,CRP更常用。目前,各机构血清降钙素原和CRP的使用各不相同,临床医生还需要继续根据临床判断诊断脓毒症。在英国或欧洲,血清降钙素原目前尚未被作为诊断的指标。一项有关儿科脓毒症患者多种生物标志物的研究使用分类与回归树分析检验了12种生物标志物,以对患者进行危险分层来帮助临床决策,以及在将来的临床试验中进行分层<sup>39</sup>。

框图5显示严重脓毒症的鉴别诊断。

## 脓毒症如何管理?

小儿脓毒症的管理首先需要及时识别。加强对医务人员关于识别儿童和新生儿脓毒症预警或不良体征的教育和培训,以进行适当的分诊和快速处理。回顾性研究提示儿童死亡与初次就诊时未能识别严重脓毒症和脓毒性休克,从而导致延误的或不适当的治疗有关<sup>40-41</sup>。标准的ABC(气道、呼吸、循环)方案及特别强调早期使用抗生素和液体复苏是小儿脓毒症和脓毒性休克治疗的关键。

## 根据美国医学院的重症医学监护指南及医疗模式制定的治疗

捆绑医疗模式(a care bundle)是指从循证的实践指南中总结出的一系列方案。使用捆绑医疗模式的目的是保证医疗保健系统中提供的所有关键要素的可靠性。遵守指南或医疗模式与改进预后相关<sup>42</sup>。

美国重症医学院(ACCM)2002年在儿科和新生儿脓毒性休克血流动力学支持(ACCM-PALS)的ACCM指南中,发表了儿科和新生儿休克血流动力学的临床实践参数,并于2007年进行了更新<sup>43</sup>。这些指南基于广泛回顾现有文献后在专家共识的基础上而制定。有几个单位已经报告严重脓毒症患者生存率提高与更大程度上遵循ACCM-PALS指南有关。

波士顿儿童医院急诊科的一项研究观察了在1个小时内实现诊疗五要素(严重脓毒症的早期识别、血管通路、抗生素给药、静脉输液和液体复苏难治性休克的升压药治疗)和住院天数的关系。在那些接受ACCM指南推荐的诊疗模式的重症监护病房中,患者的入住重症监护室时间(平均5.5比6.8天)及住院时间(平均6.8比10.9天)明显更短<sup>44</sup>。

## 框图5 严重脓毒症的鉴别诊断

### 先天性心脏病

动脉导管依赖性先天性心脏病可类似早发型或晚发型新生儿脓毒症。鉴别的体征包括充血性心力衰竭(在左心梗阻性病变,如主动脉缩窄、主动脉瓣狭窄)或严重的、难治性紫绀(发绀病变如大动脉转位或肺动脉闭锁)。

鉴别试验:胸片可显示肺水肿和梗阻性心脏病变心脏肥大的证据;超声心动图能够揭示详细的解剖。

### 非感染性全身炎症反应综合征(SIRS)

SIRS和器官功能障碍可由多种其他的刺激导致,包括体外循环、创伤、胰腺炎、烧伤。很难区分SIRS和脓毒症的患者,但非感染性SIRS通常会有一些其他的损伤史。

### 噬血细胞性淋巴组织细胞增多症

可能是原发性的(常与遗传性免疫缺陷有关)或继发性的(例如,由病毒性疾病引发);临床特征经常类似严重脓毒症,严重的病例可伴发热、休克、多器官功能衰竭。诊断标准包括肝大,这可能是一个鉴别点。

### 神经阻滞剂恶性综合征

以高热、全身僵硬(这可能是一个鉴别体征),以及自主神经失调(例如,出汗和血压不稳定)为临床特点。这个综合征的发生为使用抗精神病药物的一种特殊并发症。

### 恶性高热

特点是极端的高热、心动过速、僵硬和使用刺激剂后横纹肌溶解(通常麻醉剂)。

在这项研究中,坚持所有五要素的诊疗只有19%。在英国先前的重症监护病房中,只有38%遵守了ACCM-PALS指南<sup>45</sup>。依从度差的原因是多因素的<sup>46</sup>。波士顿儿童医院的同一个团队随后报道,他们采用了以过程为中心的质量改进方法,将他们的五元素模式遵从率从19%上升到了100%。他们观察到病死率从4.8%下降到1.7%<sup>47</sup>。

儿童严重脓毒症和脓毒性休克的处理非常复杂,并且时间紧迫。诊疗模式可能有助于使严重脓毒症患儿所需的治疗过程简化和流程化,从而治疗更及时。

拯救脓毒症运动(SSC)([www.survivingsepsis.org/Pages/default.aspx](http://www.survivingsepsis.org/Pages/default.aspx))建议,通过更多的基于与医疗保健研究所(Institute for Healthcare Improvement)合作而开发的LADER方法,在研究机构内进行系统改变:

- 了解脓毒症和改善质量。



- 建立基线过程和结果检测方法以证明改进的必要。
- 机构领导层和利益相关者要求购买。
- 制定机构特定的脓毒症诊疗模式方案。
- 教育利益相关者。
- 修复错误和预见到前进道路上的障碍。

SSC 诊疗模式可在线获取([www.survivingsepsis.org/Bundles/Pages/default.aspx](http://www.survivingsepsis.org/Bundles/Pages/default.aspx))。

### 儿科脓毒症六大措施

“儿科脓毒症六大措施”是临床诊疗模式的一个示范,旨在促进严重脓毒症的迅速识别,以及在时间紧迫性方面提供最初的6项护理关键点。由英国脓毒症信托儿科集团发表,小儿脓毒症六项措施是以成人脓毒症六项措施为模型。成人措施中,此项目已被证实可提高对复苏方案及早期目标针对性治疗方案的依从性,并能减少病死率<sup>30</sup>。

“儿科脓毒症六大措施”并不取代现有ACCM-PALS指南;它是提高指南依从性的可操作性方案。它促使医疗护理人员及早认识脓毒症,并开始迅速治疗。其目的是通过教育形成一种认识,即脓毒症是一种需要紧急干预的急症。工具箱内所包含的内容是一个整合的监护系统以记录依从性。

如果一名患儿有疑似或经证实的感染,并至少有两个以下表现,临床医生应考虑脓毒症或脓毒性休克:

- 核心温度 $<36\text{ }^{\circ}\text{C}$ 或 $>38.5\text{ }^{\circ}\text{C}$ ( $<97\text{ }^{\circ}\text{F}$ 或 $>101\text{ }^{\circ}\text{F}$ )。
- 不适当的心动过速(根据当地标准或高级儿科生命支持指南)。
- 精神状态改变(嗜睡、烦躁、倦怠、松弛、意识水平降低)。
- 外周灌注减少或毛细血管再充盈时间延长。

如果有疑问,应该咨询具有儿童脓毒症识别经验的临床医生。下列措施应在1小时内开始实施:

- 应给予氧气吸入。
- 建立静脉或骨髓通道,应进行血液检查,包括血液培养、血糖(低血糖应治疗)和动脉、毛细血管或静脉血气。对全血细胞计数、血清乳酸和CRP也应进行基线评估。
- 按当地标准,静脉或骨髓内给予广谱抗生素。
- 应考虑液体复苏,目的是恢复正常的循环量和生理参数。等张液(20 ml/kg)应滴注超过5分钟,

必要时重复。液体复苏需谨慎,通过检查捻发音(啰音)和肝大,以避免液体超载。

- 应邀请经验丰富的资深临床医生或专家参与和早期咨询。
- 当给予 $\geq 40\text{ ml/kg}$ 液体后,仍未恢复正常生理参数,应尽早考虑血管活性药物的使用。肾上腺素或多巴胺可通过外周静脉或骨髓通路注射给药。

### 呼吸道和呼吸支持

气道和呼吸管理遵循高级生命支持与复苏流程。

应给予供氧,在心血管不稳定或休克时,最初给予高流量高浓度的氧气。新生儿最好是通过带储氧袋的面罩或头罩氧吸入。一旦患者血流动力学稳定,氧气应根据脉搏血氧饱和度调节,以使氧饱和度 $>94\%$ 。应注意早产儿或怀疑有先天性心脏病的新生儿。

患者的气道应保持开放。如果患者需要呼吸支持,或患者意识水平降低,建议插管。机械通气通过减少呼吸功和左室功能的正效应,从而减少心血管患者的心脏负荷<sup>48</sup>。插管诱导麻醉时,临床医生应做好心血管衰竭或心脏骤停的准备。

临床医生应考虑在诱导麻醉时,液体复苏的同时使用正性肌力药物。推荐使用具有相对稳定的心血管作用的麻醉剂(如氯胺酮和罗库溴铵)。因为担心对肾上腺功能的抑制,依托咪酯目前并不推荐用于儿童脓毒性休克的麻醉。

### 早期液体复苏

由于毛细血管渗漏导致严重的血管内液体丢失,这种情况可能持续数天。液体复苏的目的是恢复正常的心率、血压和毛细血管再充盈时间。

关键是快速早期输液,目的是恢复正常的心率和血压等生理参数<sup>43</sup>。液体选择虽然仍是一个有争论的话题,但只要是等张液,也不是那么重要。晶体液如氯化钠(0.9%)和复方乳酸钠(哈特曼溶液或乳酸林格液)是常用的,而且适用;白蛋白(4.5%)也可用于液体复苏。儿童脓毒症使用胶体复苏可能具有理论优势,但胶体液在成人液体复苏并不常用<sup>49</sup>,尚没有足够的证据支持或反对在儿童中应用胶体液<sup>50-51</sup>。

对液体难治性休克,应早期考虑应用血管活性药物。



液体应按 20 ml/kg 快速输注,必要时可重复。液体应在无液量超载体征时(即呼吸频率增加、肺捻发音、肝大、奔马律)才能给予。由于液体分布不均,脓毒性休克患儿在入院第一个 24 小时内接受 100 ml/kg 的液体复苏并不少见,但在液体难治性休克,血管活性药物支持也应尽早考虑。

维持液的需求取决于临床条件,并根据每个孩子的需要来评估和制定。使用下列方程计算液体量:

(第一个 10 kg 需 4 ml/kg)+(11~20 kg 之间每千克需 2 ml/kg)+( >20 kg 以上每千克需 1 ml/kg)=每小时液量

使用这个方程评估的液体量常被高估。通常的建议是限制流量为方程估计值的 60%~80%,因为儿童脓毒症常因抗利尿激素异常分泌综合征而存在水潴留。相反,如果孩子有显著发热,不显性失水可能增加。

总结液体量并定期复查肾功能和血清电解质水平很重要。NICE 制定的静脉输液的进一步指南目前正在商讨,并将在适当的时候发表。

### 进一步液体平衡的维持

适当的液体复苏后,仍不能自然维持液体平衡的患者,可予利尿。方法包括利尿剂、腹膜透析、连续静脉-静脉血液滤过,或肾替代治疗。队列研究数据显示,肾替代疗法开始前有液量超载的危重患儿(>20%)具有较高的病死率<sup>52-53</sup>。

血流动力学不稳定及急性肾损伤的危重症患儿常见液体超载,因此相关临床症状监测很重要。液体超载的指征包括听诊肺捻发音、肝大、较基础水平>10%的体重增加。

### 抗生素治疗

早期使用抗生素能挽救生命。成人一项研究已表明,脓毒性休克启用抗生素每延迟 1 小时,病死率增加 7.6%<sup>54</sup>。儿童只有少数类似的研究,但有有力证据表明早期给予抗生素治疗能够挽救儿童生命。一项 80 例儿童的回顾性研究观察到,入院 1 小时内接受抗生素治疗的患儿,其入院后第一个 24 小时内的血乳酸水平和 CRP 值均较其他患儿有显著降低。尽管这项研究不足以检测到病死率的变化,在入院 1 小时内接受抗生素治疗的患儿,休克纠正的时间明显缩短<sup>55</sup>。另一项 130 例小儿脓毒

症或脓毒性休克患者的回顾性研究报告显示,在儿科重症监护病房(ICU),从确定脓毒症到使用抗生素超过 3 小时的儿童,病死率比值比(OR)(3.92)增加(根据病情严重程度校正后的 OR 为 4.84)<sup>56</sup>。

抗生素的选择是复杂的,应该基于临床症状、基础疾病、药物不耐受和局部病原敏感性进行选择。初始治疗应选择覆盖各年龄组和地区流行微生物的广谱抗生素。一旦确定了病原体,应改为适当的窄谱抗生素方案。

基于每天的临床效果评估抗生素,并在适当的时候降级是很好的做法。5~7 天静脉注射抗生素的疗程能够对抗大部分简单的感染。深部或播散性的感染或免疫功能低下患者的感染,可能需要延长抗菌药物疗程。

如果有任何异常的情况下,或临床状况没有改善的情况下,应咨询感染科专家有关适当的抗菌药物选择及疗程的建议。

框图 6 提供了新生儿脓毒症抗生素治疗的一般指南。

对于婴幼儿,经验性抗生素方案应该覆盖最常见的微生物(如金黄色葡萄球菌、脑膜炎奈瑟氏菌和流感嗜血杆菌)。对于社区获得性感染,三代头孢菌素(如头孢噻肟或头孢曲松钠)是合适的一线选择。医院获得性感染可使用广谱青霉素(如哌拉西林/他唑巴坦)或碳青霉烯类(如美罗培南)。根据具体的情况,其他覆盖相应微生物的药物也可以考虑(例如,庆大霉素、环丙沙星或万古霉素)<sup>58</sup>。

美罗培南是广谱抗生素,覆盖革兰阳性和革兰阴性菌,包括假单胞菌。环丙沙星、哌拉西林/他唑巴坦也覆盖革兰阴性菌<sup>58</sup>。万古霉素覆盖血管导管相关的凝固酶阴性葡萄球菌和耐甲氧西林金黄色葡萄球菌(MRSA),也被建议用于中性粒细胞减少患者治疗导管相关脓毒症,虽然这通常并不是首选治疗,除非有导管相关脓毒症的征象<sup>59</sup>。

替考拉宁也可用于这种情况。克林霉素应用于毒素引起的伴难治性低血压的中毒性休克综合征<sup>60</sup>。

中性粒细胞减少的患者,哌拉西林/他唑巴坦或美罗培南是首选药物。NICE 支持哌拉西林/他唑巴坦作为一线药物,如果有临床恶化(如休克),则升级到碳青霉烯类(如美罗培南)<sup>59</sup>。

### 抗真菌和抗病毒治疗

抗生素治疗的同时,给予抗真菌药物预防治

## 框图6 用于新生儿脓毒症的抗生素

### 用于早发型新生儿脓毒症的抗生素

- 新生儿早发型脓毒症的定义是在出生后的第一个72小时内发生的脓毒症<sup>15</sup>。
- 抗生素治疗方案应包括B组链球菌和革兰阴性杆菌。NICE推荐的一个合适的经验性抗生素方案是苄青霉素加庆大霉素<sup>57</sup>；另一个是氨苄青霉素加庆大霉素或头孢噻肟。

### 用于晚发型新生儿脓毒症的抗生素

- 晚发型新生儿脓毒症是出生后第一个72小时至1个月期间发生的脓毒症<sup>18</sup>。
- 致病生物与早发型新生儿脓毒症不同,不同地区之间也各不相同。在发达国家,凝固酶阴性葡萄球菌是主要原因,其次是B组链球菌和革兰阴性菌。
- 致病生物的治疗选择包括:
  - 凝固酶阴性葡萄球菌:万古霉素
  - B组链球菌、大肠杆菌、肠球菌:头孢噻肟、哌拉西林/他唑巴坦
  - 革兰阴性菌(如克雷伯杆菌):庆大霉素
  - 假单胞菌:头孢他啶、哌拉西林/他唑巴坦
  - 李斯特菌:氨苄青霉素
  - 厌氧菌(如在坏死性肠炎时):甲硝唑或克林霉素
- 适当的经验性抗生素治疗的例子包括氨苄西林加庆大霉素或头孢噻肟,或万古霉素加庆大霉素或头孢噻肟。头孢他啶、哌拉西林/他唑巴坦可用于假单胞菌的经验性治疗方案。甲硝唑或克林霉素可以用于覆盖厌氧菌或坏死性小肠结肠炎的经验性治疗。

NICE:英国国家健康与临床优选研究所

疗,各机构的实践不同。新生儿可能口服制霉菌素,有助于预防念珠菌病。

极低出生体重儿(<1 500 g)和任何年龄的免疫功能低下儿童都具有特定的原发性侵袭性真菌感染或继发真菌感染的风险,原因是由于抗生素治疗过程中改变了表面的定植菌群。如果疑似或确诊侵袭性真菌感染,患者可能需要长期静脉注射氟康唑或两性霉素B治疗。低出生体重儿和免疫功能低下疑似脓毒症患者,除经验性抗生素外,应给予抗真菌治疗。

如果患者病史或检查有证实,严重脓毒症应予单纯疱疹病毒的治疗(如阿昔洛韦)。单纯疱疹病毒1型(HSV-1)感染可能在出生时从母亲获得并成为活动性感染。先天性HSV-1感染可以是非常严重和毁灭性的,因此,对早发型新生儿脓毒症,在检测结果出来之前就应该开始治疗。

## 输血

血红蛋白是组织供氧必不可少的,对血流动力学不稳定(心输出量降低,低平均动脉压)而供氧能力损伤的脓毒症患儿的整体治疗至关重要。在这些患者,建议血红蛋白浓度应保持在>10 g/dl(近似浓缩细胞体积为0.3)。一旦休克得到纠正,较低的输血阈值可能是适当的。在一项ICU输血阈值试验,血流动力学稳定的脓毒症亚组分析显示,限制性和自由性输血阈值(血红蛋白分别为7 g/dl比9.5 g/dl)儿童在病死率、住院时间或进一步的器官衰竭上无明显差异<sup>61</sup>。

## 糖皮质激素

严重脓毒症和脓毒性休克患者使用皮质激素的证据常具争议性<sup>62</sup>。拯救脓毒症运动指南不建议成人严重脓毒症常规使用氢化可的松,但推荐它作为液体复苏无反应和正性肌力药物无效的脓毒性休克的一个治疗选择。在儿童中,在怀疑或证实伴有绝对肾上腺功能不全的液体复苏无反应和正性肌力药物无效的休克患者使用氢化可的松的证据有限<sup>60,63</sup>。

## 新生儿脓毒症的特殊考虑

在早产儿及新生儿,脓毒性休克与其他形式的休克难以区分。任何新生儿合并心原性休克的征象时(如灌注差、紫绀、心脏杂音、肝大、脉压变化及上下肢血压差变化),应该开始在专家指导下给予前列腺素输注(即前列地尔或地诺前列酮),除非能够排除导管依赖性心脏病变。

## 体温控制

应保持正常体温 [36.5~37.5 °C (97.5~99.5 °F)]。可能需要外部热源。相反,过热增加任何年龄的代谢需求,应避免。

## 随访

对那些存在将他们置于高风险脓毒症或脓毒症后遗症发生可能的特定的发病前因素的患儿,也需要不同于其他患儿的监测。随访往往取决于基础条件(例如,呼吸随访有肺炎的儿童)。有些孩子可能需要后续有一组医生随访,如专家、社区药剂师和社区儿科医生。

出现复发性脓毒症或有原发性免疫缺陷家庭史的儿童(如补体障碍)应接受正规的免疫随访。复发性感染是一种特征,预防性抗生素的必要性应

与儿科免疫学家讨论。

严重脓毒症或危重病患儿在恢复后,生长发育的长期监测非常重要,是一个需进一步考量的问题。

## 脓毒症的并发症是什么?

### 肾功能不全

心输出量减少通常引起一过性少尿;但无尿罕见<sup>64</sup>。虽然急性肾功能不全相对比较常见,但很少与组织学改变相关或需要长期肾脏替代治疗。通过纠正容量丢失和低血压,通常能够纠正少尿<sup>64</sup>。

### 心肌功能障碍

心肌功能障碍通常时间短暂,而且并不严重,很少导致死亡<sup>65</sup>。循环心肌抑制因子被认为是其病因。经过充分的液体复苏,应考虑使用血管活性正性肌力药物。在液体复苏无反应的难治性休克早期,使用血管活性剂被证实能够改善预后<sup>43,66</sup>。

### 弥散性血管内凝血

凝血功能障碍和弥散性血管内凝血的患者需要维持正常血小板计数和国际标准化比值。

关于儿童脓毒症合并弥漫性血管内凝血和凝血功能障碍者血小板和凝血成分的输注,尚无任何研究。需谨慎对症治疗以避免出血。应输注浓缩血小板维持血小板计数 $>50\ 000/\mu\text{l}$ 以降低颅内出血的风险。应输注新鲜冷冻血浆维持正常凝血功能,其目的是达到一个正常的国际标准化比值。冷沉淀物具有较高浓度的凝血因子VIII和纤维蛋白原,可用于治疗低纤维蛋白血症。

### 低血糖

中度低血糖是指血糖水平为 $2.0\sim 3.0\text{ mmol/L}$ ,严重低血糖定义为血糖 $<2.0\text{ mmol/L}$ <sup>33</sup>。

在脓毒症时,糖原储备可以被耗尽,因此,监测血糖和静脉持续输注葡萄糖治疗低血糖以提供适当年龄的葡萄糖供给(例如,10%葡萄糖 $2\text{ ml/kg}$ 静脉注射,随后以标准的维护液要求维持输注)是非常重要的<sup>43</sup>。

### 高血糖

高血糖是常见的脓毒症应激反应的一部分或皮质类固醇治疗的不良反应。虽然高血糖已知与

多种临床情况的不良预后有关(包括儿科重症监护),尚没有科学论著提出对血糖控制的确定性建议<sup>33</sup>。当前实践中高血糖的管理方案在各机构间各不相同,但严格控制(即治疗至目标血糖 $4.0\sim 7.0\text{ mmol/L}$ )并不能改善主要临床预后,并有增加低血糖的风险<sup>33</sup>。作者的做法是如果两次连续测定血糖水平超过 $12\text{ mmol/L}$ 则给予持续胰岛素输注(如果患者在儿科重症监护室)。

### 神经肌肉无力

脓毒症、全身性炎症反应综合征和多器官衰竭是获得性神经肌肉无力的危险因素<sup>32</sup>。神经肌肉无力与不活动的时间长度、糖皮质激素的应用以及神经肌肉阻滞剂有关。

### 坏死性小肠结肠炎

坏死性肠炎的病理生理机制尚不完全明确。这似乎是一个多因素和多系统的疾病<sup>67</sup>。危险因素包括肠道不成熟、不适当的肠道菌群定植、缺氧或缺血、人工配方喂养、选择性浓缩红细胞输血。出生体重 $500\sim 1\ 500\text{ g}$ 婴儿的平均患病率是7%。坏死性小肠结肠炎的病死率估计为20%~30%<sup>67</sup>。

经典的表现是早产儿增加肠内喂养容量后,发生呕吐胆汁胃液、腹胀和大便量增加。腹部影像学检查可能包括肠壁间积气、气体自肝门呈树枝状向外围伸展,以及气腹。

管理涉及联合静脉广谱抗生素与肠道休息的保守治疗。肠穿孔的患者需要外科干预,可能包括行剖腹手术切除患病或坏死的肠管,随后行肠造口术。康复过程中,婴儿可发生继发于肠狭窄的小肠梗阻。

坏死性小肠结肠炎的幸存者存在很高的长期神经发育问题的风险。其他并发症包括长期肠外营养需求与短肠综合征。

### 多器官功能衰竭

脓毒症多器官衰竭的治疗主要是支持治疗。包括有效的抗生素治疗、目标导向治疗(扭转低血压、贫血、凝血功能障碍、出血和休克),以及ICU的标准支持治疗。这可能包括通气支持、镇静和血液滤过。

### 新生儿持续性肺动脉高压

脓毒症引起的酸中毒和缺氧可导致肺动脉高血压和持续性动脉导管开放。右心室负荷增加可导致右心衰竭伴肝充血和心输出量下降。



通过动脉导管肺动脉静脉血与主动脉含氧的血液混合,导致右手臂和下肢氧饱和度之间的差异。

治疗包括吸入一氧化氮或正性肌力药物,或两者联合。

### 低钙血症

低钙血症在需要入住重症监护病房的严重脓毒症或脓毒性休克儿童中常见。

儿童脓毒性休克治疗的国际共识准则包括纠正代谢异常,包括低钙血症。该建议不是基于随机对照试验具体的证据;然而,低钙血症是公认的心功能不全的促进因素<sup>68</sup>。建议在进行输血时需提高警惕,因为血液存储中用到的柠檬酸可降低血浆钙水平。静脉注射10%的葡萄糖酸钙是推荐治疗。

### 腹腔间隙综合征

腹腔间隙综合征是由于如肠水肿及腹水等因素引起腹内压升高所致。如果平均动脉压不能代偿上升的腹内压,腹部器官灌注将会受损。

### 甲状腺功能不全

当有心输出量或心脏指数降低的证据时,应行甲状腺功能测定。如果有证据表明甲状腺功能不全,则开始甲状腺替代治疗(也就是说,血清甲状腺刺激激素水平升高或血清游离甲状腺素低)。对甲状腺功能正常的病态综合征患者,甲状腺替代疗法无效。

### 神经系统后遗症

局灶性神经功能缺损和听力损失是细菌性脑膜炎已知的并发症。肺炎球菌脑膜炎的病死率和发病率比脑膜炎球菌性脑膜炎高。

### 预后如何?

未经治疗的严重脓毒症会导致病死率超过80%<sup>69</sup>。经治疗,19岁以下儿童的总病死率约为10%<sup>70</sup>。在儿童没有性别差异。存在基础疾病的患者与先前健康的儿童相比,病死率为12.8%,显著高于后者的7.8%<sup>71</sup>。

在癌症患儿中,脓毒症总病死率为17%。接受过造血干细胞移植治疗的儿童病死率增高到30%。在这个高风险人群中,真菌感染性脓毒症不成比例的占到病死率的63%<sup>72</sup>。

入住ICU时持续休克与增加的死亡OR(3.8)相

## 器官功能障碍的标准化诊断标准,根据儿科脓毒症国际共识的指南<sup>3</sup>

### 心血管功能障碍

- 低血压(定义为血压<同年龄第5百分位数或收缩压低于同年龄正常值>2个标准偏差),或
- 需应用血管活性药物治疗低血压,或
- 满足下列异常指标中任何两种:
  - 代谢性酸中毒(碱缺乏>5 mmol/L)
  - 动脉血乳酸浓度增加(超过正常上限的2倍)
  - 少尿(尿量<0.5 ml·kg<sup>-1</sup>·h<sup>-1</sup>)
  - 毛细血管再充盈时间延长(>5秒)
  - 核心和外周体温差升高(>3℃)
- 这些异常必须是在1小时内快速给予40 ml/kg液体复苏后仍持续存在

### 呼吸功能不全

动脉血气异常:

- P/F比率(动脉血氧分压/吸入氧浓度)<300(在没有紫绀型心脏病或已知的基础肺疾病的情况下),或
- 动脉二氧化碳压力>65 mmHg,或高于基线水平20 mmHg,或
- 需要吸入氧浓度>0.5以保持脉搏血氧饱和度>92%,或
- 机械通气要求(有创或无创)

### 神经功能障碍

- Glasgow昏迷评分<12,或
- Glasgow昏迷评分从异常基线急性下降>3分

### 血液学异常

- 血小板计数<80 000 /μl,或
- 3天内血小板计数从最高值下降50%,或
- 国际标准化比值>2

### 肾功能不全

- 血清肌酐>正常值上限的2倍,或
- 血清肌酐增加>基线水平的2倍

### 肝功能不全

- 总胆红素>68 μmol/L(新生儿年龄范围以外),或
- 丙氨酸转氨酶(ALT)>正常上限的2倍

关<sup>45</sup>。持续性休克的每小时中,死亡OR为2.29(95%可信区间为1.19~4.44)<sup>73</sup>。

美国波士顿儿童医院的一项研究发现,根据ACCM-PALS的指南,早期进行脓毒症的诊断和复苏,在儿科重症监护室的平均住院日为5.5天,在医院的平均住院日为8天<sup>44</sup>。

This clinical review series has been developed for *The BMJ* in collaboration with BMJ Best Practice (<http://bestpractice.bmj.com>), an independent product produced by BMJ Publishing Group Limited. BMJ

## 其他的教育资源

为医疗保健人员的资源

- National Institute for Health and Care Excellence. Feverish illness in children: assessment and initial management in children younger than 5 years. (Clinical guideline CG160.) 2013. ([www.nice.org.uk/guidance/CG160](http://www.nice.org.uk/guidance/CG160))——intended for use by healthcare professionals
- Scottish Intercollegiate Guidelines Network 2008. Management of invasive meningococcal disease in children and young people (<http://sign.ac.uk/guidelines/fulltext/102/index.html>)——a national clinical guideline with recommendations on early assessment of meningococcal disease
- Surviving Sepsis Campaign. Guidelines ([www.survivingsepsis.org/guidelines/Pages/default.aspx](http://www.survivingsepsis.org/guidelines/Pages/default.aspx))——international guidelines for management of severe sepsis and septic shock. Includes recommendations for the treatment of paediatric patients Centers for Disease Control and Prevention. Group B strep (GBS). 2014 ([www.cdc.gov/groupBstrep/](http://www.cdc.gov/groupBstrep/)) ——provides a range of educational and practical guidance for group B streptococci
- National Institute for Health and Care Excellence. Antibiotics for early-onset neonatal infection: antibiotics for the prevention and treatment of early-onset neonatal infection. (Clinical guideline CG149) 2012 ([www.nice.org.uk/guidance/cg149](http://www.nice.org.uk/guidance/cg149)) ——provides antibiotic recommendations for suspected early-onset neonatal infections
- National Institute for Health and Care Excellence. Bacterial meningitis and meningococcal septicaemia: management of bacterial meningitis and meningococcal septicaemia in children and young people younger than 16 years in primary and secondary care. (Clinical guideline CG102) 2010 ([www.nice.org.uk/guidance/cg102/chapter/guidance](http://www.nice.org.uk/guidance/cg102/chapter/guidance))——offers best practice advice on the care of children and young people younger than 16 years with bacterial meningitis and meningococcal septicaemia
- Canadian Paediatric Society. Prevention and management of neonatal herpes simplex virus infections. 2014 ([www.cps.ca/documents/position/prevention-management-neonatal-herpes-simplex-virus-infections](http://www.cps.ca/documents/position/prevention-management-neonatal-herpes-simplex-virus-infections)) ——this guideline provides a comprehensive overview of the management of neonatal herpes simplex virus infections
- Brierley J, Carcillo JA, Choong K, et al. Clinical practice parameters for hemodynamic support of pediatric and neonatal septic shock: 2007 update from the American College of Critical Care Medicine. *Crit Care Med* 2009;37:666-88——emphasises early use of age specific treatments to attain time sensitive goals

Best Practice comprises web/mobile topics that support evidence-based decision making at the point of care. Peer review of the content in this clinical review was carried out exclusively according to BMJ Best Practice's own, independent process (<http://bestpractice.bmj.com/best-practice/marketing/how-is-bestpractice-produced.html>). This adaptation of a BMJ Best Practice topic for a clinical review in *The BMJ* uses only a portion of content from the latest available web version of BMJ Best Practice. BMJ Best Practice is updated on an ongoing basis, and the content of any BMJ Best Practice topic is expected to change periodically including subsequent to its publication as a clinical review in *The BMJ*. To view the complete and current versions of all BMJ Best Practice topics, please refer to the BMJ Best Practice website (<http://bestpractice.bmj.com>). Content from BMJ Best Practice is intended to support, aid and supplement the expertise, discretion and judgment of licensed medical health professionals who remain solely responsible for decisions regarding diagnosis and treatment of their patients. Content from BMJ Best Practice is not intended to function as a substitute for a licensed medical health professional's judgment. BMJ Best Practice reflects evidence available to its authors and licensors prior to publication. *The BMJ* relies on its authors to confirm the accuracy of the information presented to reflect generally accepted practices. While *The BMJ* seeks to ensure BMJ Best Practice is up to date and accurate, it does not warrant that is the case. Content from BMJ Best Practice is supplied on an "as is" basis and any statements made to the contrary are void. BMJ Best Practice does not endorse drugs, diagnose patients, or recommend therapy. The full disclaimer

applicable to BMJ Best Practice can be found at <http://bestpractice.bmj.com/best-practice/marketing/disclaimer.html>.

贡献者 (Contributors): AP (guarantor): authored the sections on introduction, epidemiology, pathophysiology and causes, prevention, and diagnosis. JT authored the sections on management, complications, and prognosis

利益竞争 (Competing interests): We have read and understood the BMJ Group policy on declaration of interests and declare the following interests: AP and JT are involved in the Paediatric Sepsis Six initiative.

来源与同行评议 (Provenance and peer review): Commissioned; externally peer reviewed.

## 参考文献

- 1 Bone RC. The sepsis syndrome. Definition and general approach to management. *Clin Chest Med* 1996;17:175-81.
- 2 Hotchkiss RS, Karl IE. The pathophysiology and treatment of sepsis. *N Engl J Med* 2003;348:138-50.
- 3 Goldstein B, Giroir B, Randolph A; International Consensus Conference on Pediatric Sepsis. International pediatric sepsis consensus conference: definitions for sepsis and organ dysfunction in pediatrics. *Pediatr Crit Care Med* 2005;6:2-8.
- 4 World Health Organization Global Health Observatory. Causes of child mortality. 2013. [www.who.int/gho/child\\_health/mortality/causes/en/](http://www.who.int/gho/child_health/mortality/causes/en/)
- 5 Vincent JL, Opal SM, Marshall JC, et al. Sepsis definitions: time

- for change. *Lancet* 2013;381:774-5.
- 6 World Health Organization. The World Health report 1996—fighting disease, fostering development. May 1996. [www.who.int/whr/1996/en/](http://www.who.int/whr/1996/en/).
  - 7 Watson RS, Carcillo JA, Linde-Zwirble WT, et al. The epidemiology of severe sepsis in children in the United States. *Am J Respir Crit Care Med* 2003;167:695-701.
  - 8 Hartman ME, Linde-Zwirble WT, Angus DC, et al. Trends in the epidemiology of pediatric severe sepsis. *Pediatr Crit Care Med* 2013;14:686-93.
  - 9 Ruth A, McCracken CE, Fortenberry JD, et al. Pediatric severe sepsis: current trends and outcomes from the Pediatric Health Information Systems database. *Pediatr Crit Care Med* 2014;15:828-38.
  - 10 Weiss SL, Fitzgerald JC, Pappachan J, et al. Global epidemiology of pediatric severe sepsis: the Sepsis PRevalence, OUcomes, and Therapies study. *Am J Respir Crit Care Med* 2015; published online 3 Mar.
  - 11 Soeorg H, Huik K, Parm U, et al. Genetic relatedness of coagulase-negative Staphylococci from gastrointestinal tract and blood of preterm neonates with late-onset sepsis. *Pediatr Infect Dis J* 2013;32:389-93.
  - 12 Randolph AG, McCulloh RJ. Pediatric sepsis: important considerations for diagnosing and managing severe infections in infants, children, and adolescents. *Virulence* 2013;5:8-18.
  - 13 Lee CY, Chen PY, Huang FL, et al. Microbiologic spectrum and susceptibility pattern of clinical isolates from the pediatric intensive care unit in a single medical center—6 years' experience. *J Microbiol Immunol Infect* 2009;42:160-5.
  - 14 Greenhow TL, Hung YY, Herz AM. Changing epidemiology of bacteremia in infants aged 1 week to 3 months. *Pediatrics* 2012;129:e590-6.
  - 15 Stoll BJ, Gordon T, Korones SB, et al. Early-onset sepsis in very low birth weight neonates: a report from the National Institute of Child Health and Human Development Neonatal Research Network. *J Pediatr* 1996;129:72-80.
  - 16 Bizzarro MJ, Raskind C, Baltimore RS, et al. Seventy-five years of neonatal sepsis at Yale: 1928-2003. *Pediatrics* 2005;116:595-602.
  - 17 Posfay-Barbe KM, Wald ER. Listeriosis. *Semin Fetal Neonatal Med* 2009;14:228-33.
  - 18 Stoll BJ, Gordon T, Korones SB, et al. Late-onset sepsis in very low birth weight neonates: a report from the National Institute of Child Health and Human Development Neonatal Research Network. *J Pediatr* 1996;129:63-71.
  - 19 Remick DG. Pathophysiology of sepsis. *Am J Pathol* 2007;170:1435-44.
  - 20 Levine MM, Campbell JD, Kotloff KL. Overview of vaccines and immunisation. *Br Med Bull* 2002;62:1-13.
  - 21 Department of Health. Meningococcal B vaccination programme to be introduced [press release]. 2014. <https://www.gov.uk/government/news/meningococcal-b-vaccination-programme-to-be-introduced>.
  - 22 World Health Organization. Decade of vaccines—global vaccine action plan 2011-2020. 2015. [www.who.int/immunization/global\\_vaccine\\_action\\_plan/DoV\\_GVAP\\_2012\\_2020/en/](http://www.who.int/immunization/global_vaccine_action_plan/DoV_GVAP_2012_2020/en/).
  - 23 Bion J, Richardson A, Hibbert P, et al; Matching Michigan Collaboration & Writing Committee. 'Matching Michigan': a 2-year stepped interventional programme to minimise central venous catheter-blood stream infections in intensive care units in England. *BMJ Qual Saf* 2013;22:110-23.
  - 24 Schrag S, Gorwitz R, Fultz-Butts K, et al. Prevention of perinatal group B streptococcal disease. Revised guidelines from CDC. *MMWR Recomm Rep* 2002;51:1-22.
  - 25 Centers for Disease Control and Prevention (CDC). Perinatal group B streptococcal disease after universal screening recommendations—United States, 2003-2005. *MMWR Morb Mortal Wkly Rep* 2007;56:701-5.
  - 26 Verani JR, McGee L, Schrag SJ; Centers for Disease Control and Prevention (CDC). Prevention of perinatal group B streptococcal disease-revised guidelines from CDC, 2010. *MMWR Recomm Rep* 2010;59:1-36.
  - 27 Van de Wetering MD, van Woensel JB, Lawrie TA. Prophylactic antibiotics for preventing Gram positive infections associated with long-term central venous catheters in oncology patients. *Cochrane Database Syst Rev* 2013;11:CD003295.
  - 28 Weiss SL, Parker B, Bullock ME, et al. Defining pediatric sepsis by different criteria: discrepancies in populations and implications for clinical practice. *Pediatr Crit Care Med* 2012;13:e219-26.
  - 29 Vergnano S, Sharland M, Kazembe P, et al. Neonatal sepsis: an international perspective. *Arch Dis Child Fetal Neonatal Ed* 2005;90:F220-4.
  - 30 Daniels R, Nutbeam T, McNamara G, et al. The sepsis six and the severe sepsis resuscitation bundle: a prospective observational cohort study. *Emerg Med J* 2011;28:507-12.
  - 31 National Institute for Health and Care Excellence. Feverish illness in children under 5 years. (Quality standard QS64.) 2014. [www.nice.org.uk/guidance/qs64](http://www.nice.org.uk/guidance/qs64).
  - 32 Brierley J, Peters MJ. Distinct hemodynamic patterns of septic shock at presentation to pediatric intensive care. *Pediatrics* 2008;122:752-9.
  - 33 Macrae D, Grieve R, Allen E, et al. A randomized trial of hyperglycemic control in pediatric intensive care. *N Engl J Med* 2014;370:107-18.
  - 34 Polin RA; Committee on Fetus and Newborn. Management of neonates with suspected or proven early-onset bacterial sepsis. *Pediatrics* 2012;129:1006-15.
  - 35 Garcia-Prats JA, Cooper TR, Schneider VF, et al. Rapid detection of microorganisms in blood cultures of newborn infants utilizing an automated blood culture system. *Pediatrics* 2000;105:523-7.
  - 36 Levi M, Toh CH, Thachil J, et al. Guidelines for the diagnosis and management of disseminated intravascular coagulation. *Br J Haematol* 2009;145:24-33.
  - 37 Kayange N, Kamugisha E, Mwizamholya DL, et al. Predictors of positive blood culture and deaths among neonates with suspected neonatal sepsis in a tertiary hospital, Mwanza-Tanzania. *BMC Pediatr* 2010;10:39.
  - 38 Kaplan JM, Wong HR. Biomarker discovery and development in pediatric critical care medicine. *Pediatr Crit Care Med* 2011;12:165-73.
  - 39 Wong HR, Salisbury S, Xiao Q, et al. The pediatric sepsis biomarker risk model. *Crit Care* 2012;16:R174.
  - 40 Pearson GA, ed. Why children die: a pilot study 2006; England (South West, North East and West Midlands), Wales and Northern Ireland. CEMACH; 2008.
  - 41 Parliamentary and Health Service Ombudsman. Time to act. Severe sepsis: rapid diagnosis and treatment saves lives. 2013. [www.ombudsman.org.uk/\\_\\_data/assets/pdf\\_file/0004/22666/FINAL\\_Sepsis\\_Report\\_web.pdf](http://www.ombudsman.org.uk/__data/assets/pdf_file/0004/22666/FINAL_Sepsis_Report_web.pdf).
  - 42 Levy MM, Rhodes A, Phillips GS, et al. Surviving sepsis campaign: association between performance metrics and outcomes in a 7.5-year study. *Crit Care Med* 2015;43:3-12.



- 43 Brierley J, Carcillo JA, Choong K, et al. Clinical practice parameters for hemodynamic support of pediatric and neonatal septic shock: 2007 update from the American College of Critical Care Medicine. *Crit Care Med* 2009;37:666-88.
- 44 Paul R, Neuman MI, Monuteaux MC, et al. Adherence to PALS Sepsis Guidelines and Hospital Length of Stay. *Pediatrics* 2012; 130:e273-80.
- 45 Inwald DP, Tasker RC, Peters MJ, et al; Paediatric Intensive Care Society Study Group (PICS-SG). Emergency management of children with severe sepsis in the United Kingdom: the results of the Paediatric Intensive Care Society sepsis audit. *Arch Dis Child* 2009;94:348-53.
- 46 Kissoon N. Sepsis guideline implementation: benefits, pitfalls and possible solutions. *Crit Care* 2014;18:207.
- 47 Paul R, Melendez E, Stack A, et al. Improving adherence to PALS septic shock guidelines. *Pediatrics* 2014;133:e1358-66.
- 48 Shekerdemian L, Bohn D. Cardiovascular effects of mechanical ventilation. *Arch Dis Child* 1999;80:475-480.
- 49 Perel P, Roberts I, Ker K. Colloids versus crystalloids for fluid resuscitation in critically ill patients. *Cochrane Database Syst Rev* 2013;2:CD000567.
- 50 Akech S, Ledermann H, Maitland K. Choice of fluids for resuscitation in children with severe infection and shock: systematic review. *BMJ* 2010;341:c4416.
- 51 Carcillo JA. Intravenous fluid choices in critically ill children. *Curr Opin Crit Care* 2014;20:396-401.
- 52 Goldstein SL, Somers MJG, Baum MA, et al. Pediatric patients with multi-organ dysfunction syndrome receiving continuous renal replacement therapy. *Kidney Int* 2005;67:653-8.
- 53 Sutherland SM, Zappitelli M, Alexander SR, et al. Fluid overload and mortality in children receiving continuous renal replacement therapy: the Prospective Pediatric Continuous Renal Replacement Therapy Registry. *Am J Kidney Dis* 2010;55:316-25.
- 54 Kumar A, Roberts D, Wood KE, et al. Duration of hypotension before initiation of effective antimicrobial therapy is the critical determinant of survival in human septic shock. *Crit Care Med* 2006;34:1589-96.
- 55 Wang XD, Huo XM, Xu MX, et al. Clinical research of timing of application of antibiotics in septic shock of pediatric patients. *Zhonghua Wei Zhong Bing Ji Jiu Yi Xue* 2013;25:207-10.
- 56 Weiss SL, Fitzgerald JC, Balamuth F, et al. Delayed antimicrobial therapy increases mortality and organ dysfunction duration in pediatric sepsis. *Crit Care Med* 2014;42:2409-17.
- 57 National Institute for Health and Care Excellence. Antibiotics for early-onset neonatal infection: antibiotics for the prevention and treatment of early-onset neonatal infection. (Clinical guideline CG149) 2012. [www.nice.org.uk/guidance/cg149](http://www.nice.org.uk/guidance/cg149).
- 58 Simmons ML, Durham SH, Carter CW. Pharmacological management of pediatric patients with sepsis. *AACN Adv Crit Care* 2012;23:437-48.
- 59 National Institute for Health and Care Excellence. Neutropenic sepsis: prevention and management of neutropenic sepsis in cancer patients. (Clinical guideline CG151) 2012. [www.nice.org.uk/guidance/cg151](http://www.nice.org.uk/guidance/cg151).
- 60 Dellinger RP, Levy MM, Rhodes A, et al; Surviving Sepsis Campaign Guidelines Committee. Surviving Sepsis Campaign: international guidelines for management of severe sepsis and septic shock: 2012. *Crit Care Med* 2013;41:580-637.
- 61 Karam O, Tucci M, Ducruet T, et al. Red blood cell transfusion thresholds in pediatric patients with sepsis. *Pediatr Crit Care Med* 2011;12:512-8.
- 62 Zimmerman JJ. A history of adjunctive glucocorticoid treatment for pediatric sepsis: moving beyond steroid pulp fiction toward evidence-based medicine. *Pediatr Crit Care Med* 2007;8:530-9.
- 63 Aneja R, Carcillo JA. What is the rationale for hydrocortisone treatment in children with infection-related adrenal insufficiency and septic shock? *Arch Dis Child* 2007;92:165-9.
- 64 Wheeler AP, Bernard GR. Treating patients with severe sepsis. *N Engl J Med* 1999;340:207-14.
- 65 Hollenberg SM, Ahrens TS, Annane D, et al. Practice parameters for hemodynamic support of sepsis in adult patients: 2004 update. *Crit Care Med* 2004;32:1928-48.
- 66 Ninis N, Phillips C, Bailey L, et al. The role of healthcare delivery in the outcome of meningococcal disease in children: case-control study of fatal and non-fatal cases. *BMJ* 2005;330:1475.
- 67 Neu J, Walker WA. Necrotizing enterocolitis. *N Engl J Med* 2011; 364:255-64.
- 68 Drop LJ, Laver MB. Low plasma ionized calcium and response to calcium therapy in critically ill man. *Anesthesiology* 1975;43:300-6.
- 69 Friedman G, Silva E, Vincent JL. Has the mortality of septic shock changed with time? *Crit Care Med* 1998;26:2078-86.
- 70 Angus DC, Linde-Zwirble WT, Lidicker J, et al. Epidemiology of severe sepsis in the United States: analysis of incidence, outcome, and associated costs of care. *Crit Care Med* 2001;29:1303-10.
- 71 Watson RS, Carcillo JA. Scope and epidemiology of pediatric sepsis. *Pediatr Crit Care Med* 2005;6(suppl 3):S3-5.
- 72 Fiser RT, West NK, Bush AJ, et al. Outcome of severe sepsis in pediatric oncology patients. *Pediatr Crit Care Med* 2005;6:531-6.
- 73 Han YY, Carcillo JA, Dragotta MA, et al. Early reversal of pediatric-neonatal septic shock by community physicians is associated with improved outcome. *Pediatrics* 2003;112:793-9.

BMJ takes no responsibility for the accuracy of the translation from the published English language original and is not liable for any errors that may occur.

**BMJ**
